# Supplementary material
Source: PubMed Central journal article supplement (PMC30379)
Supplement: nar_29_3_693__1.pdf [file nar_29_3_693__1.pdf]

## SUPPLEMENTARY MATERIAL

**Table S1.** Drug–DNA NOEs in the d(GGTAATTACC)<sub>2</sub> complex with Hoechst 43254

| Drug residue | DNA proton | Distance (Å) |
|--------------|------------|--------------|
| bz1 H4       | T6 H1'     | 3.18         |
| bz1 H4       | T6* H1'    | 3.31         |
| bz1 H4       | A5* H1'    | 5.00         |
| ph H6        | A5 H1'     | 5.00         |
| ph H6        | T3 H1'     | 3.87         |
| ph H6        | C9* H1'    | 4.10         |
| ph H6        | A4 H1'     | 3.73         |
| bz1 H7       | T7 H5'     | 3.73         |
| bz2 H7       | T7 H5'     | 3.52         |
| bz2 H6       | T7 H5'     | 3.02         |
| bz2 H6       | T7* H5'    | 3.38         |
| ph H6        | A4 H2      | 3.17         |
| ph H5        | A4 H2      | 2.65         |
| bz1 H4       | A5* H2     | 2.63         |
| bz1 H4       | A8 H2      | 3.54         |
| tp H3/5      | C9 H1'     | 3.58         |
| tp H3/5      | A4* H1'    | 5.00         |
| tp H3/5      | A5* H1'    | 2.81         |
| tp H3/5      | A4* H2     | 2.43         |
| tp H3/5      | A8 H2      | 3.28         |
| bz2 H6       | T7 H4'     | 3.33         |
| bz2 H6       | T7* H4'    | 3.76         |
| bz1 H7       | A8 H5'     | 4.46         |
| bz1 H6       | A8 H5'     | 2.92         |
| bz1 H6       | A8 H5''    | 2.89         |
| bz1 H6       | T7 H5'     | 5.00         |
| bz2 H4       | A8* H1'    | 4.92         |
| ph H5        | A8* H1'    | 5.05         |
| tp H4        | A4* H2     | 3.93         |
| tp H4        | A5* H1'    | 3.21         |
| tp H3/5      | A8 H2'     | 5.23         |
| tp H3/5      | A8 H2''    | 5.00         |
| tp H3/5      | A8 H5'     | 2.98         |
| tp H3/5      | A8 H4'     | 4.00         |
| ph H6        | A5 H2      | 5.95         |
| tp H3/5      | A5* H2     | 3.56         |
| ph H5        | A4 H2      | 3.71         |
| ph H6        | A4 H2      | 3.25         |
| bz1 H4       | A4* H2     | 2.71         |
| tp NH        | A5* H2     | 5.59         |
| tp NH        | A4* H2     | 4.38         |
| bz1 NH       | A5* H2     | 5.11         |
| bz1 NH       | A4* H2     | 4.65         |
| bz2 H4       | T7* NH     | 4.56         |
| ph H5        | T7* NH     | 4.07         |
| bz1 H4       | T6 NH      | 4.60         |
| bz2 NH       | T6* NH     | 4.49         |
| bz1 NH       | T6 H2'     | 5.08         |
| bz1 NH       | T6 H2''    | 4.74         |
| tp H3/5      | T7 NH      | 4.85         |

Strands run from G1 to C10 and from G1\* to C10\*.
